# Supplementary material
Source: PubMed Central journal article supplement (PMC5777077)

# Supporting Information

Wang et al. 10.1073/pnas.1718759114

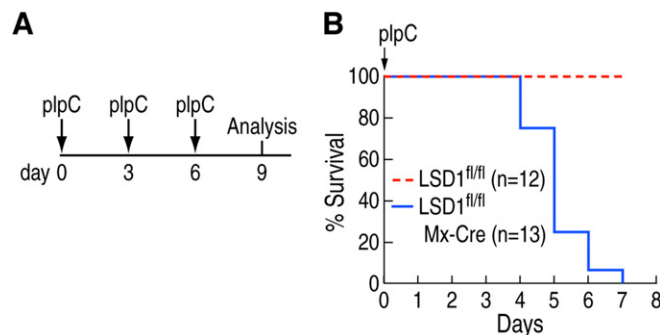

**Fig. S1.** LSD1 deficiency leads to sudden death due to endotoxic shock. (A) Schematic presentation of standard experimental design of plpC-induced gene deletion. (B) Survival curve after single plpC injection into *LSD1<sup>fl/fl</sup>; Mx-Cre* (*LSD1<sup>-/-</sup>*) mice ( $n = 13$ ) and the control (*LSD1<sup>fl/fl</sup>*) mice ( $n = 12$ ).

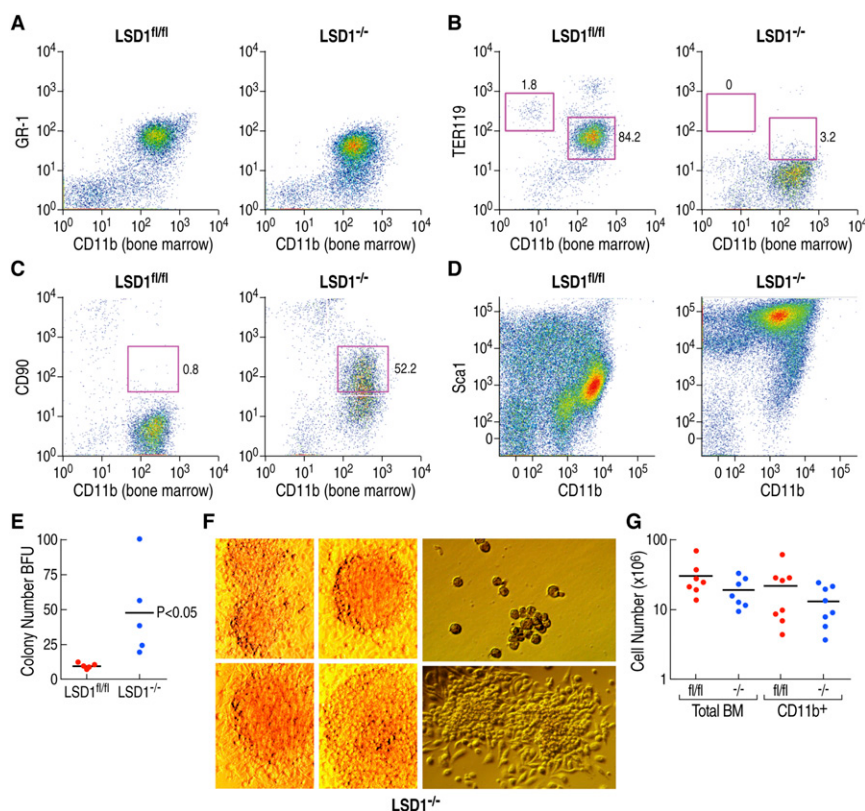

**Fig. S2.** LSD1-deficient mice have acute expansion of hyperproliferative and hyperinflammatory myeloid progenitors in BM. (A) The representative expression of CD11b and GR-1 of BM cells from *LSD1<sup>fl/fl</sup>; Mx-Cre* (*LSD1<sup>-/-</sup>*) mice and the control mice are shown. (B) The representative expression of CD11b and TER119 of BM cells from *LSD1<sup>fl/fl</sup>; Mx-Cre* (*LSD1<sup>-/-</sup>*) mice and the control mice are shown. Numbers are indicated as the percentage of indicated quadrant population among total BM cells; (C) The representative expression of CD11b and CD90 of BM cells from *LSD1<sup>fl/fl</sup>; Mx-Cre* (*LSD1<sup>-/-</sup>*) mice and the control mice are shown. Numbers are indicated as the percentage of indicated quadrant population among total BM cells. (D) The representative expression of CD11b and Sca1 of BM cells from *LSD1<sup>fl/fl</sup>; Mx-Cre* (*LSD1<sup>-/-</sup>*) mice and the control mice are shown. (E) Total BM cells were isolated from *LSD1<sup>fl/fl</sup>; Mx-Cre* (*LSD1<sup>-/-</sup>*) mice and the control mice were cultured in methylcellulose-based medium supplement with a mixture of cytokines. The number of BFU colonies is shown after in vitro serial transfer into the methylcellulose-based medium. Data are shown as an average of triplicates, and error bar indicates the SD. (F) *LSD1*-deficient BM cells gain self-renewal (colonies at Left) and become SCF- and IL-3-independent (colonies at Right). (G) Total or CD11b-positive BM cells were determined from *LSD1<sup>-/-</sup>* mice and the control mice.

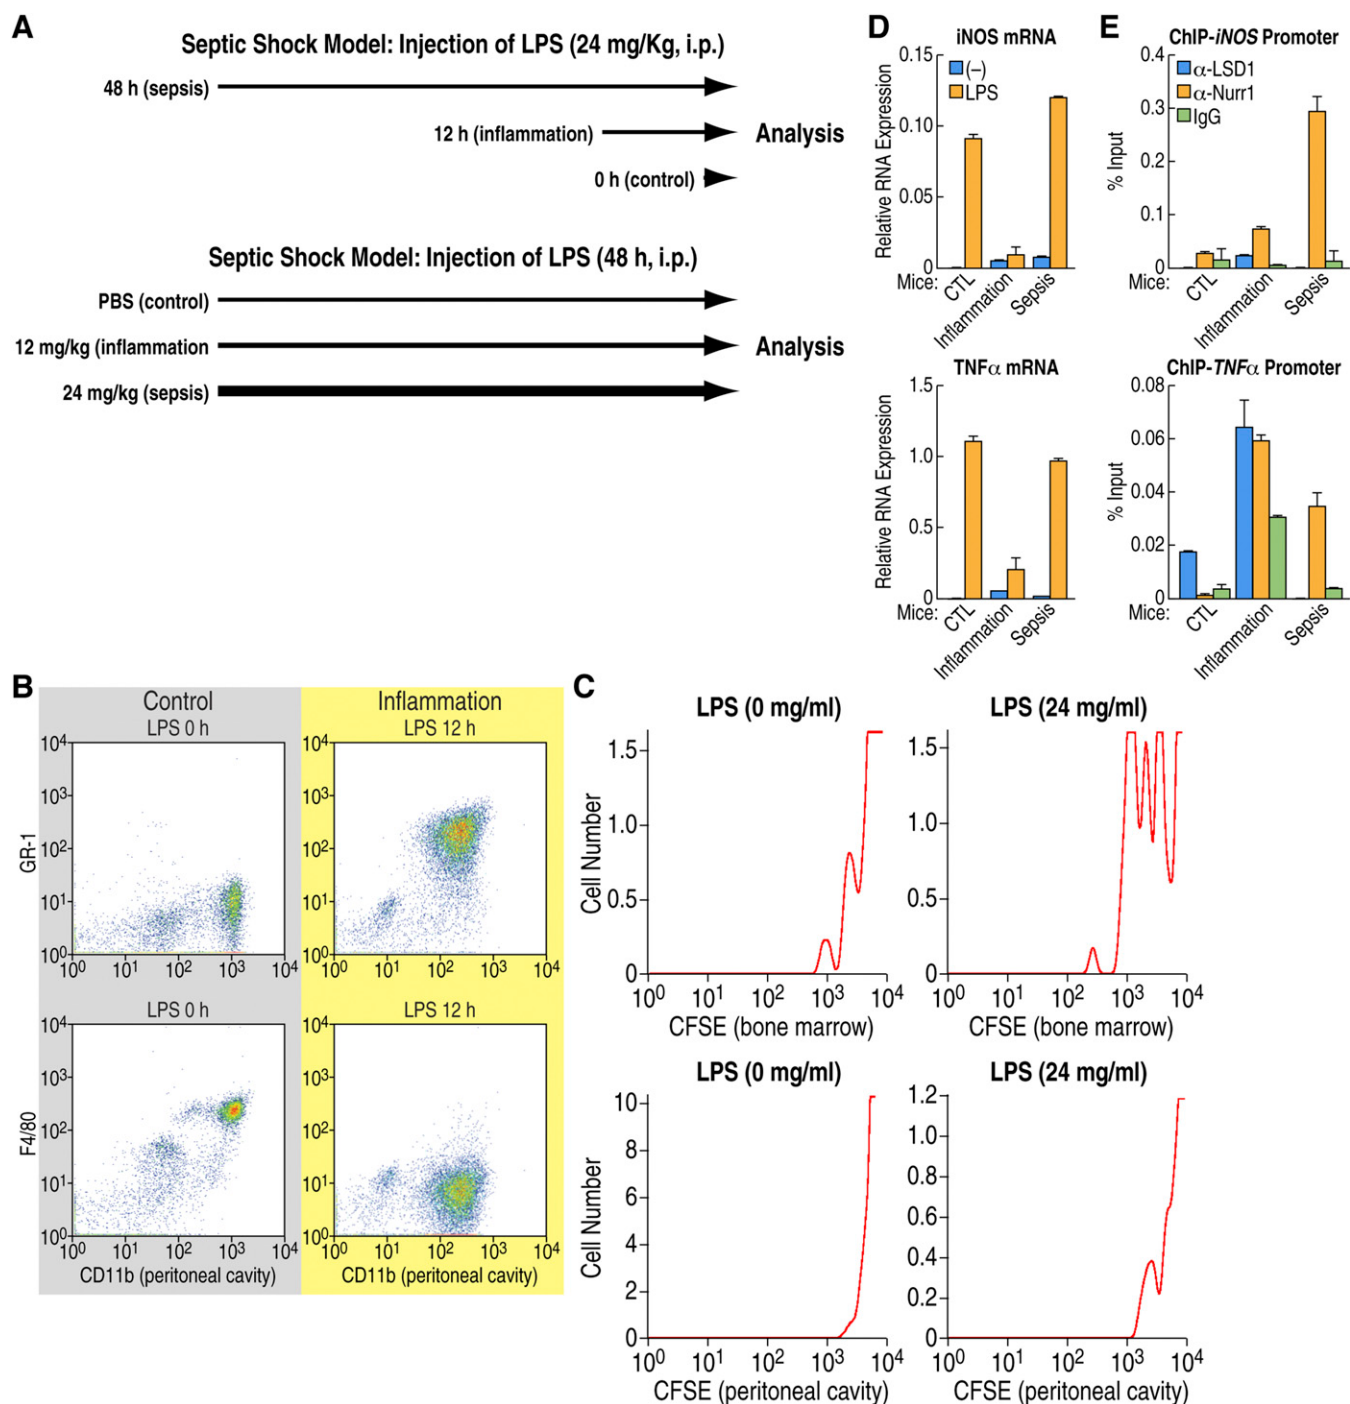

**Fig. S3.** Altered HSC homeostasis in mice during sepsis. (A) Schematic experimental designs of endotoxin (LPS)-induced endotoxemic shock. (B) The representative expression of CD11b, GR-1, and F4/80 on peritoneal cavity cells after indicated hours of LPS injection is shown. (C) Total BM cells and peritoneal cavity cells were isolated from sepsis-induced mice and cultured for 24 h *in vitro*, and expression of CFSE gated on lineage negative cKit positive cells is shown. (D) Expression of *iNOS* (Upper) and *TNF- $\alpha$*  (Lower) upon LPS treatment in control, inflammation, and sepsis conditions. (E) Recruitment of LSD1 (blue bar) and Nurr1 (orange bar) onto *iNOS* promoter (Upper) or *TNF- $\alpha$*  promoter (Lower) measured by ChIP assay.

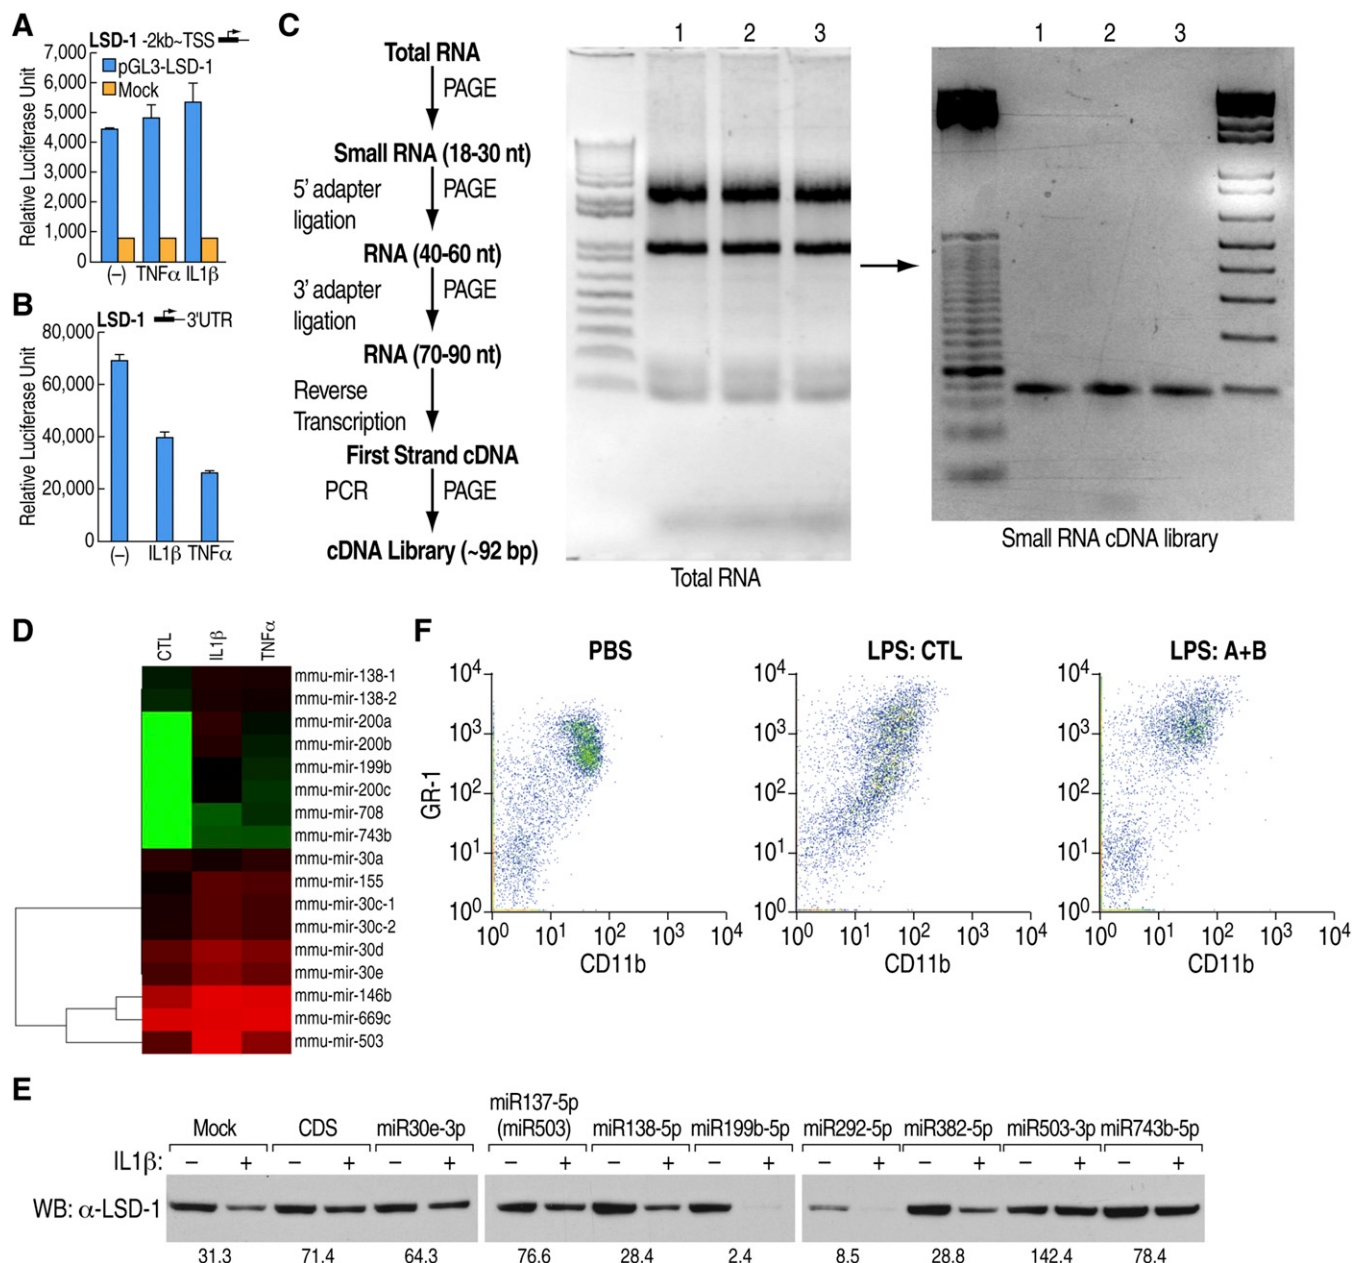

**Fig. S4.** miRNA-mediated down-regulation of LSD1 during sepsis. (A) Luciferase report assays using 2-kb LSD1 promoter, revealing no effect of TNF- $\alpha$  or IL-1 $\beta$  treatment on reporter activity. (B) Luciferase report assays using LSD1 3' UTR, revealing repressive effect of TNF- $\alpha$  or IL-1 $\beta$  treatment on reporter activity. (C) Schematic diagram of miR-seq experiments. (D) Heat map of miRNAs induced upon treatment. (E) Western blot analysis, revealing LSD1 expression is regulated by miRNAs upon IL-1 $\beta$  treatment. Seed sequences on LSD1 3'UTR are mutated accordingly, and LSD1 expression are measured in the presence or absence of IL-1 $\beta$  treatment. (F) The representative expression of CD11b and GR-1 on BM cells during animal models of sepsis is shown. After indicated time of 24 mg/kg LPS injection, mice with BMT using anti-miR group A+B or control are analyzed based on expression of CD11b and GR-1 expression on BM cells.

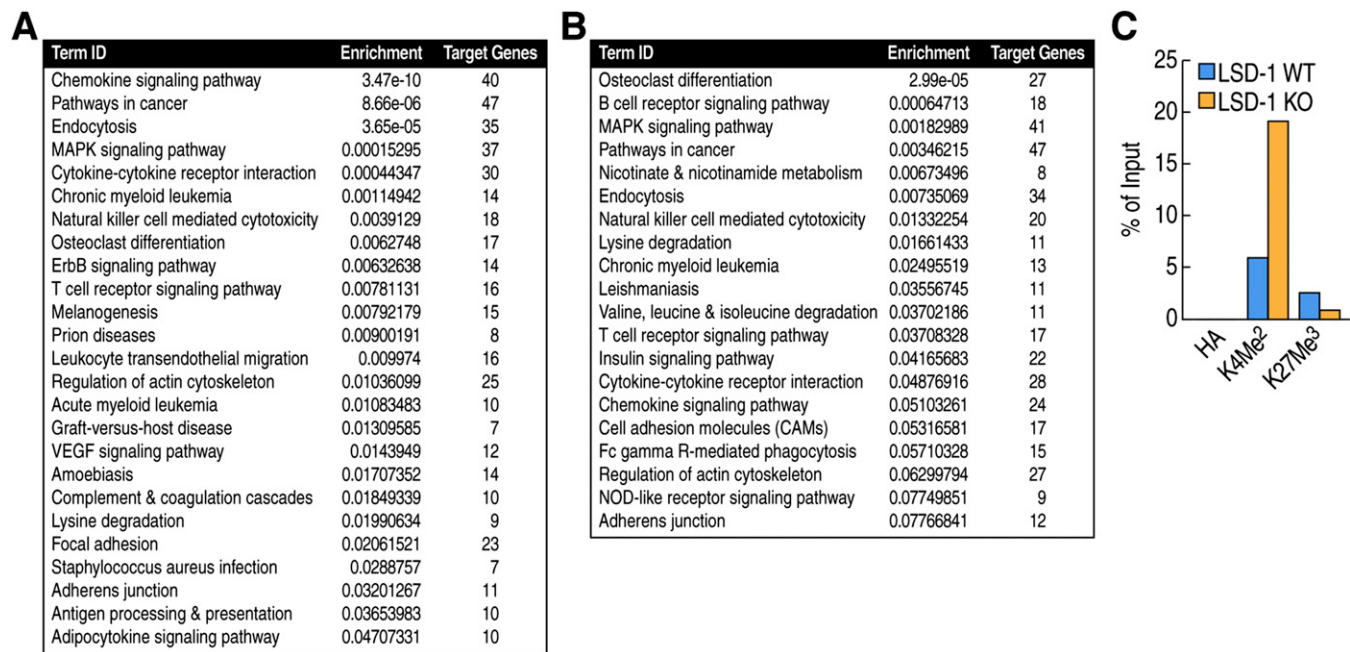

Supplement: pnas.201718759SI.pdf [file pnas.201718759SI.pdf]
